# Supplementary material for: Multifunctional magnesium-organic framework doped biodegradable bone cement for antibacterial growth, inflammatory regulation and osteogenic differentiation
Source: Royal Society of Chemistry journal article supplement (doi:10.1039/d2tb02705d), 2023-01-01
Supplement: d2tb02705d1.pdf [file d2tb02705d1.pdf]

## Supporting Information

### **Multifunctional Magnesium-Organic Framework Doped Biodegradable Bone Cement for Antibacterial Growth, Inflammatory Regulation and Osteogenic Differentiation**

*B. Wang* <sup>1</sup>, *H. Chen* <sup>2</sup>, *S. Peng* <sup>1</sup>, *X. Li* <sup>2</sup>, *X. Liu* <sup>2</sup>, *H. Ren* <sup>2</sup>, *Y. Yan*\* <sup>2</sup>, *Q. Zhang*\* <sup>1</sup>

1. School of Chemical Engineering, Sichuan University, Chengdu, Sichuan 610065, PR China
2. College of Physical Science and Technology, Sichuan University, Chengdu, Sichuan 610065, PR China

E-mail: qyzhang-scu@163.com, yan\_yonggang@vip.163.com

Table S1. The binding energy (eV) of M0 and M5 in O 1s, Ca 2p, C 1s.

| binding energy (eV) | O 1s     | Ca 2p        |              | C 1s      |           |               |
|---------------------|----------|--------------|--------------|-----------|-----------|---------------|
|                     | Peak C-O | Peak1 2p 1/2 | Peak2 2p 3/2 | Peak1 C=O | Peak2 C-O | Peak3 C-C/C-H |
| M0                  | 531.71   | 351.02       | 347.49       | 288.11    | 286.14    | 284.6         |
| M5                  | 531.76   | 351.04       | 347.47       | 288.18    | 286.2     | 284.6         |

Table S2. The relative content (%) of different element components in C 1s.

| Relative content (%) | C 1s      |           |               |
|----------------------|-----------|-----------|---------------|
|                      | Peak1 C=O | Peak2 C-O | Peak3 C-C/C-H |
| M0                   | 20.0      | 41.0      | 39.0          |
| M5                   | 19.8      | 33.7      | 46.4          |

Table S3. Primer sequences for Q-PCR

| Genes   | ID    | Direction | Sequences                      |
|---------|-------|-----------|--------------------------------|
| β-Actin | 11461 | FORWARD   | GTGCTATGTTGCTCTAGACTTTCG       |
|         |       | REVERSE   | ATGCCACAGGATTCCATACC           |
| Runx2   | 12393 | FORWARD   | ATGGCGTCAAACAGCCTCTTC          |
|         |       | REVERSE   | TGGTGCTCGGATCCCAAAAG           |
| BMP2    | 12156 | FORWARD   | TCTCCGGGAACAGATACAGG           |
|         |       | REVERSE   | TGGTGCCAATAGTCTGGTCA           |
| OCN     | 12096 | FORWARD   | AAGACCGCCTACAAACGCATCTAT       |
|         |       | REVERSE   | GCACTTCCTCATCTGAACTTTATTT<br>G |
| OPN     | 20750 | FORWARD   | TTGGTGACTTGGTGGTGATCTAGT       |
|         |       | REVERSE   | TCTCCTCTGAGCTGCCAGAATC         |
| COL1    | 12842 | FORWARD   | TAAGGGTCCCCAATGGTGAGA          |
|         |       | REVERSE   | GGGTCCCTCGACTCCTACAT           |

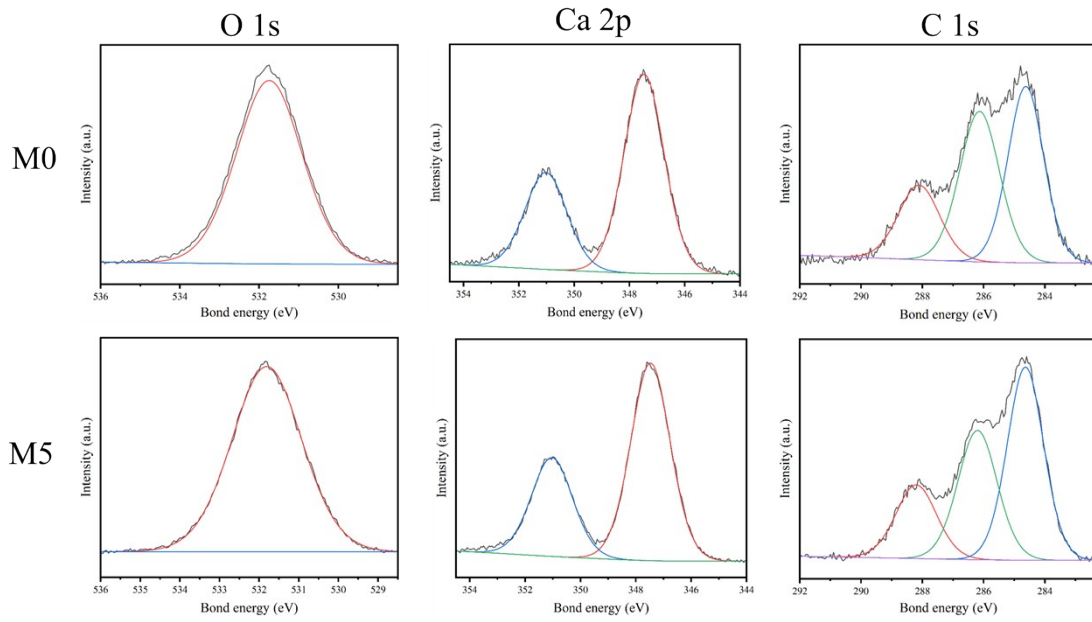

S1) High resolution of O 1s, Ca 2p and C 1s in the XPS spectra acquired from M0 and M5.

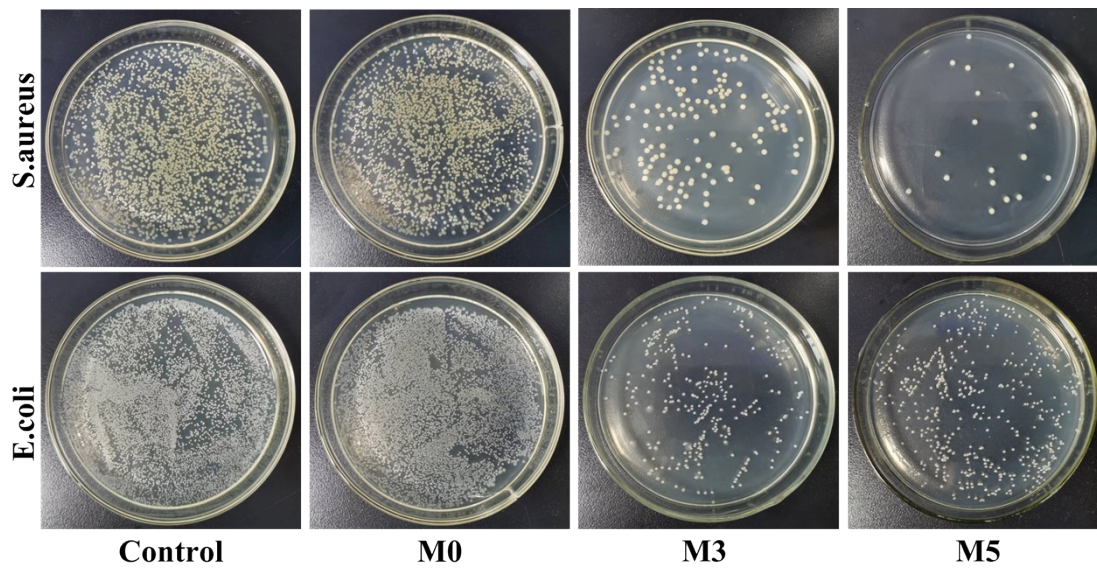

S2) The number of bacterial colonies after 24 hours of co-culture with different cements.

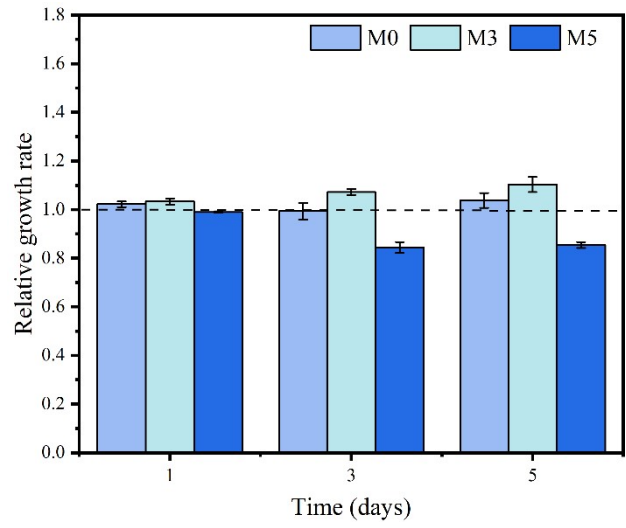

S3) Relative cell growth rate.
